# Supplementary material
Source: PubMed Central journal article supplement (PMC4011137)
Supplement: NIHMS536944-supplement-01.pdf [file NIHMS536944-supplement-01.pdf]

**Supplemental Table 1: (Sub)Subtypes, CRFs and URFs identified in the Gag, Protease, RT and Env regions of HIV-1 Isolates from Limbe Cohort patients**

| sample ID | Gag      | Protease | RT       | Env      | Genotype |
|-----------|----------|----------|----------|----------|----------|
| LB001-1   | CRF02_AG | CRF02_AG | CRF02_AG | CRF02_AG | CRF02_AG |
| LB004-1   | CRF02_AG | CRF02_AG | CRF02_AG | CRF02_AG | CRF02_AG |
| LB006-1   | CRF02_AG | CRF02_AG | CRF02_AG | CRF02_AG | CRF02_AG |
| LB007-1   | CRF02_AG | CRF02_AG | CRF02_AG | CRF02_AG | CRF02_AG |
| LB009-1   | CRF02_AG | CRF02_AG | CRF02_AG | CRF02_AG | CRF02_AG |
| LB012-1   | CRF02_AG | CRF02_AG | CRF02_AG | CRF02_AG | CRF02_AG |
| LB014-1   | CRF02_AG | CRF02_AG | CRF02_AG | CRF02_AG | CRF02_AG |
| LB015-1   | CRF02_AG | CRF02_AG | CRF02_AG | CRF02_AG | CRF02_AG |
| LB017-1   | CRF02_AG | CRF02_AG | CRF02_AG | CRF02_AG | CRF02_AG |
| LB032-1   | CRF02_AG | CRF02_AG | CRF02_AG | CRF02_AG | CRF02_AG |
| LB036-1   | CRF02_AG | CRF02_AG | CRF02_AG | CRF02_AG | CRF02_AG |
| LB043-1   | CRF02_AG | CRF02_AG | CRF02_AG | CRF02_AG | CRF02_AG |
| LB044-1   | CRF02_AG | CRF02_AG | CRF02_AG | CRF02_AG | CRF02_AG |
| LB045-1   | CRF02_AG | CRF02_AG | CRF02_AG | CRF02_AG | CRF02_AG |
| LB047-1   | CRF02_AG | CRF02_AG | CRF02_AG | CRF02_AG | CRF02_AG |
| LB048-1   | CRF02_AG | CRF02_AG | CRF02_AG | CRF02_AG | CRF02_AG |
| LB050-1   | CRF02_AG | CRF02_AG | CRF02_AG | CRF02_AG | CRF02_AG |
| LB052-1   | CRF02_AG | CRF02_AG | CRF02_AG | CRF02_AG | CRF02_AG |
| LB057-1   | CRF02_AG | CRF02_AG | CRF02_AG | CRF02_AG | CRF02_AG |
| LB061-1   | CRF02_AG | CRF02_AG | CRF02_AG | CRF02_AG | CRF02_AG |
| LB070-1   | CRF02_AG | CRF02_AG | CRF02_AG | CRF02_AG | CRF02_AG |
| LB073-1   | CRF02_AG | CRF02_AG | CRF02_AG | CRF02_AG | CRF02_AG |
| LB078-1   | CRF02_AG | CRF02_AG | CRF02_AG | CRF02_AG | CRF02_AG |
| LB081-1   | CRF02_AG | CRF02_AG | CRF02_AG | CRF02_AG | CRF02_AG |
| LB090-1   | CRF02_AG | CRF02_AG | CRF02_AG | CRF02_AG | CRF02_AG |
| LB094-1   | CRF02_AG | CRF02_AG | CRF02_AG | CRF02_AG | CRF02_AG |
| LB096-1   | CRF02_AG | CRF02_AG | CRF02_AG | CRF02_AG | CRF02_AG |
| LB098-1   | CRF02_AG | CRF02_AG | CRF02_AG | CRF02_AG | CRF02_AG |
| LB100-1   | CRF02_AG | CRF02_AG | CRF02_AG | CRF02_AG | CRF02_AG |
| LB103-1   | CRF02_AG | CRF02_AG | CRF02_AG | CRF02_AG | CRF02_AG |
| LB116-1   | CRF02_AG | CRF02_AG | CRF02_AG | CRF02_AG | CRF02_AG |
| LB117-1   | CRF02_AG | CRF02_AG | CRF02_AG | CRF02_AG | CRF02_AG |
| LB003-1   | CRF02_AG | CRF02_AG | CRF02_AG | -        | CRF02_AG |
| LB028-1   | CRF02_AG | CRF02_AG | CRF02_AG | -        | CRF02_AG |
| LB035-1   | CRF02_AG | CRF02_AG | 0CRF2_AG | -        | CRF02_AG |
| LB038-1   | CRF02_AG | CRF02_AG | CRF02_AG | -        | CRF02_AG |
| LB040-1   | -        | CRF02_AG | CRF02_AG | CRF02_AG | CRF02_AG |
| LB046-1   | CRF02_AG | CRF02_AG | CRF02_AG | -        | CRF02_AG |
| LB077-1   | -        | CRF02_AG | CRF02_AG | CRF02_AG | CRF02_AG |

|         |            |            |            |            |            |
|---------|------------|------------|------------|------------|------------|
| LB080-1 | CRF02_AG   | CRF02_AG   | CRF02_AG   | -          | CRF02_AG   |
| LB083-1 | CRF02_AG   | CRF02_AG   | CRF02_AG   | -          | CRF02_AG   |
| LB084-1 | CRF02_AG   | CRF02_AG   | CRF02_AG   | -          | CRF02_AG   |
| LB091-1 | CRF02_AG   | CRF02_AG   | CRF02_AG   | -          | CRF02_AG   |
| LB093-1 | CRF02_AG   | CRF02_AG   | CRF02_AG   | -          | CRF02_AG   |
| LB097-1 | CRF02_AG   | CRF02_AG   | CRF02_AG   | -          | CRF02_AG   |
| LB099-1 | CRF02_AG   | CRF02_AG   | CRF02_AG   | -          | CRF02_AG   |
| LB105-1 | CRF02_AG   | CRF02_AG   | CRF02_AG   | -          | CRF02_AG   |
| LB106-1 | CRF02_AG   | CRF02_AG   | CRF02_AG   | -          | CRF02_AG   |
| LB107-1 | CRF02_AG   | CRF02_AG   | CRF02_AG   | -          | CRF02_AG   |
| LB109-1 | CRF02_AG   | CRF02_AG   | CRF02_AG   | -          | CRF02_AG   |
| LB110-1 | CRF02_AG   | CRF02_AG   | CRF02_AG   | -          | CRF02_AG   |
| LB113-1 | CRF02_AG   | CRF02_AG   | CRF02_AG   | -          | CRF02_AG   |
| LB042-1 | CRF02_AG   | -          | -          | -          | CRF02_AG   |
| LB059-1 | CRF02_AG   | -          | -          | -          | CRF02_AG   |
| LB002-1 | F2         | F2         | F2         | F2         | F2         |
| LB022-1 | F2         | F2         | F2         | -          | F2         |
| LB034-1 | F2         | F2         | F2         | -          | F2         |
| LB087-1 | F2         | F2         | F2         | -          | F2         |
| LB013-1 | CRF22_01A1 | CRF22_01A1 | CRF22_01A1 | CRF22_01A1 | CRF22_01A1 |
| LB039-1 | CRF22_01A1 | CRF22_01A1 | CRF22_01A1 | CRF22_01A1 | CRF22_01A1 |
| LB054-1 | CRF22_01A1 | CRF22_01A1 | CRF22_01A1 | CRF22_01A1 | CRF22_01A1 |
| LB076-1 | CRF22_01A1 | CRF22_01A1 | CRF22_01A1 | CRF22_01A1 | CRF22_01A1 |
| LB092-1 | CRF22_01A1 | CRF22_01A1 | CRF22_01A1 | CRF22_01A1 | CRF22_01A1 |
| LB058-1 | -          | CRF22_01A1 | CRF22_01A1 | CRF22_01A1 | CRF22_01A1 |
| LB086-1 | CRF22_01A1 | CRF22_01A1 | CRF22_01A1 | -          | CRF22_01A1 |
| LB108-1 | CRF22_01A1 | CRF22_01A1 | -          | -          | CRF22_01A1 |
| LB031-1 | D          | D          | D          | D          | D          |
| LB029-1 | D          | -          | D          | D          | D          |
| LB102-1 | CRF18_CPX  | CRF18_CPX  | CRF18_CPX  | CRF18_CPX  | CRF18_CPX  |
| LB018-1 | CRF18_CPX  | -          | CRF18_CPX  | CRF18_cpx  | CRF18_CPX  |
| LB030-1 | -          | -          | G          | -          | G          |
| LB016-1 | CRF02_AG   | CRF02_AG   | CRF02_AG   | F2         | URF        |
| LB019-1 | CRF02_AG   | CRF06_CPX  | CRF02_AG   | CRF02_AG   | URF        |
| LB020-1 | CRF02_AG   | CRF16_A2D  | CRF02_AG   | CRF02_AG   | URF        |
| LB033-1 | CRF02_AG   | CRF02_AG   | CRF02_AG   | CRF22_01A1 | URF        |
| LB037-1 | CRF02_AG   | CRF02_AG   | CRF02_AG   | CRF22_01A1 | URF        |
| LB049-1 | CRF02_AG   | CRF37_CPX  | CRF02_AG   | CRF02_AG   | URF        |
| LB051-1 | CRF02_AG   | CRF36_CPX  | CRF02_AG   | CRF02_AG   | URF        |
| LB055-1 | CRF02_AG   | CRF06_CPX  | CRF02_AG   | CRF02_AG   | URF        |
| LB062-1 | CRF02_AG   | CRF36_CPX  | CRF02_AG   | CRF02_AG   | URF        |
| LB074-1 | CRF02_AG   | CRF02_AG   | CRF18_CPX  | CRF02_AG   | URF        |
| LB075-1 | CRF02_AG   | CRF02_AG   | CRF02_AG   | CRF19_cpx  | URF        |

|         |            |            |            |            |     |
|---------|------------|------------|------------|------------|-----|
| LB008-1 | -          | CRF02_AG   | CRF18_CPX  | CRF02_AG   | URF |
| LB060-1 | CRF02_AG   | CRF37_CPX  | CRF02_AG   | -          | URF |
| LB112-1 | CRF02_AG   | CRF36_CPX  | CRF02_AG   | -          | URF |
| LB066-1 | CRF02_AG   | CRF37_CPX  | CRF22_01A1 | CRF02_AG   | URF |
| LB068-1 | CRF02_AG   | CRF02_AG   | CRF36_CPX  | CRF11_cpx  | URF |
| LB088-1 | CRF02_AG   | CRF36_CPX  | CRF02_AG   | CRF19_CPX  | URF |
| LB115-1 | CRF02_AG   | CRF22_01A1 | CRF02_AG   | CRF22_01A1 | URF |
| LB095-1 | CRF02_AG   | CRF36_CPX  | CRF02_AG   | F2         | URF |
| LB005-1 | CRF22_01A1 | CRF22_01A1 | CRF02_AG   | CRF22_01A1 | URF |
| LB011-1 | CRF22_01A1 | CRF22_01A1 | CRF22_01A1 | CRF02_AG   | URF |
| LB063-1 | CRF36_CPX  | CRF22_01A1 | CRF22_01A1 | CRF22_01A1 | URF |
| LB064-1 | CRF22_01A1 | CRF22_01A1 | CRF22_01A1 | CRF02_AG   | URF |
| LB065-1 | CRF22_01A1 | K          | CRF22_01A1 | CRF22_01A1 | URF |
| LB071-1 | CRF22_01A1 | CRF22_01A1 | CRF22_01A1 | CRF25_cpx  | URF |
| LB085-1 | CRF22_01A1 | CRF01_AE   | CRF22_01A1 | CRF02_AG   | URF |
| LB023-1 | CRF22_01A1 | CRF02_AG   | CRF09_CPX  | CRF22_01A1 | URF |
| LB069-1 | CRF37_CPX  | CRF22_01A1 | F2         | CRF22_01A1 | URF |
| LB101-1 | CRF43_02G  | CRF43_02G  | CRF02_AG   | CRF43_02G  | URF |
| LB053-1 | CRF43_02G  | CRF43_02G  | G          | CRF22_01A1 | URF |
| LB041-1 | CRF43_02G  | CRF43_02GA | G          | -          | URF |
| LB079-1 | CRF43_02G  | CRF43_02G  | G          | -          | URF |
| LB082-1 | F2         | F2         | CRF22_01A1 | CRF02_AG   | URF |
| LB089-1 | F2         | F2         | F2         | CRF02_AG   | URF |
| LB027-1 | CRF27_CPX  | CRF43_02G  | G          | CRF02_AG   | URF |
| LB067-1 | CRF27_CPX  | CRF18_CPX  | G          | G          | URF |
| LB025-1 | -          | CRF02_AG   | CRF09_CPX  | A1         | URF |
| LB111-1 | CRF02_AG   | CRF36_CPX  | CRF18_CPX  | -          | URF |
| LB114-1 | CRF27_CPX  | CRF43_02G  | CRF02_AG   | -          | URF |
| LB104-1 | -          | A1         | F2         | -          | URF |
